# Supplementary material for: Electric field controlled CO2capture and CO2/N2separation on MoS2monolayers
Source: Royal Society of Chemistry journal article supplement (doi:10.1039/c6nr07001a), 2016-11-25
Supplement: c6nr07001a1.pdf [file c6nr07001a1.pdf]

## Supporting Information

### Electric Field Controlled CO<sub>2</sub> Capture and CO<sub>2</sub>/N<sub>2</sub> Separation on MoS<sub>2</sub> Monolayer

Qiao Sun, Gangqiang Qin, Yingying Ma, Weihua Wang, Ping Li, Aijun Du and Zhen Li

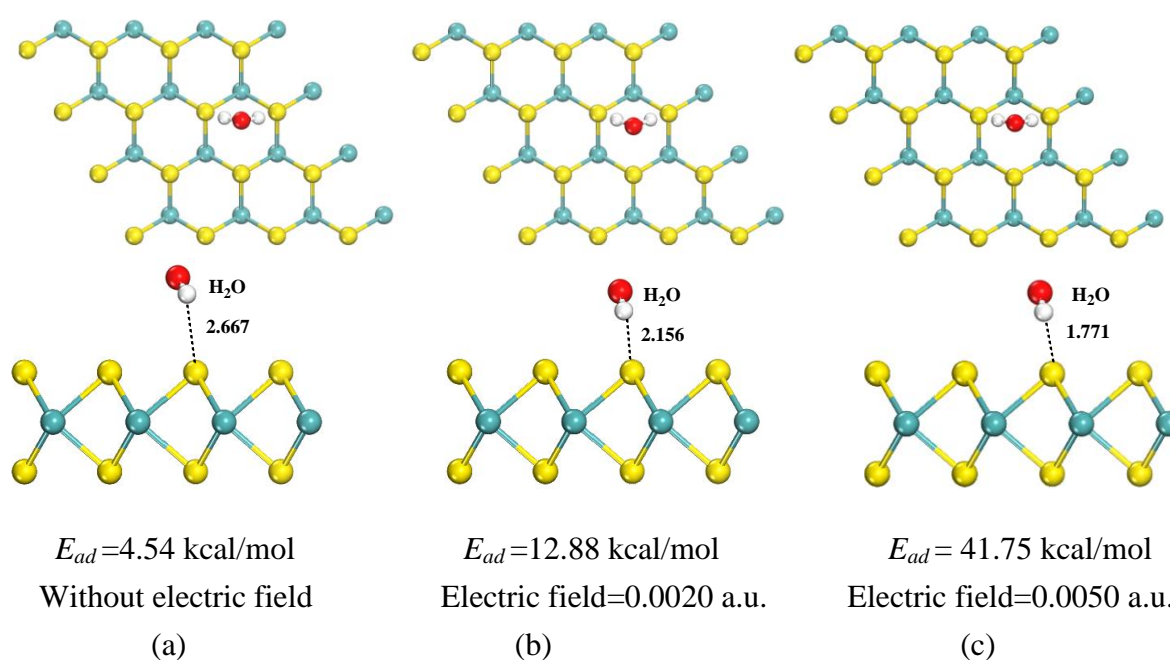

**Figure S1.** Top and side views of H<sub>2</sub>O adsorption on the surface of MoS<sub>2</sub> monolayer without an electric field, and with the electric fields of 0.0020 a.u. and 0.0050 a.u..

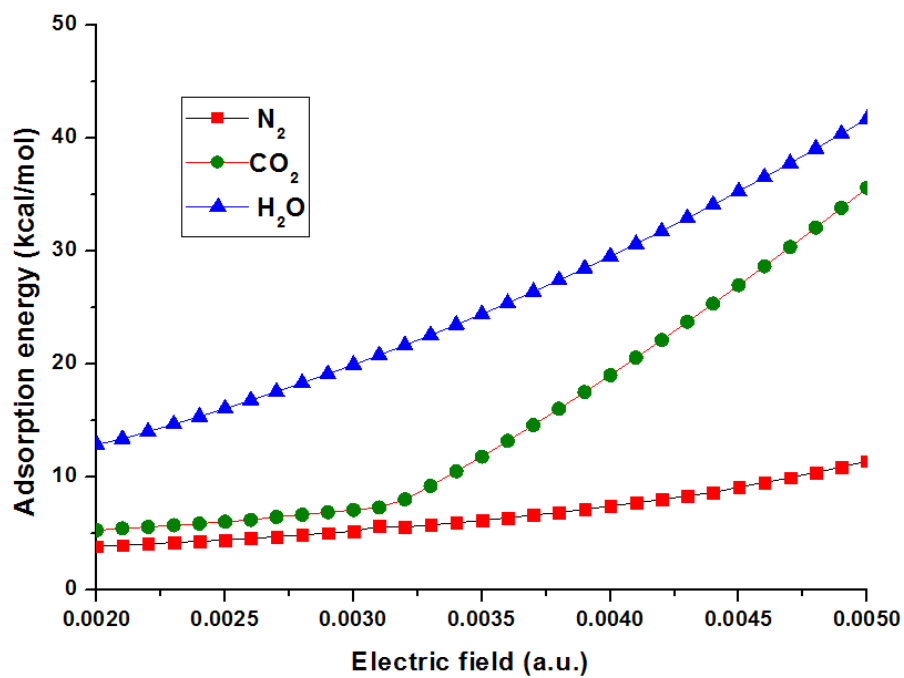

**Figure S2.** The adsorption energies (kcal/mol) of H<sub>2</sub>O, N<sub>2</sub> and CO<sub>2</sub> adsorbed on the surface of MoS<sub>2</sub> monolayer with the applied electric fields in the range of 0.0020 ~ 0.0050 a.u..

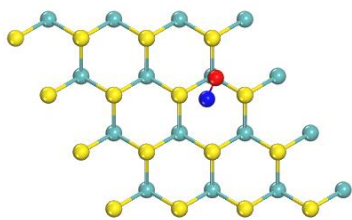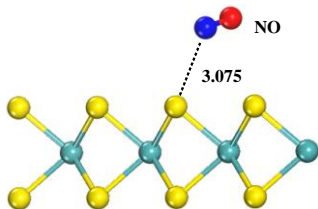

$E_{ad}=3.22$  kcal/mol  
Without electric field

(a)

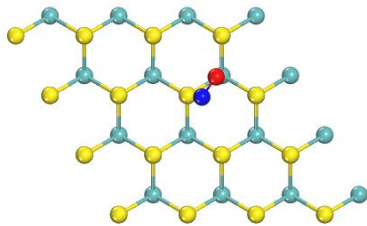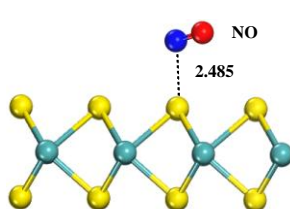

$E_{ad}=8.27$  kcal/mol  
Electric field=0.0020 a.u.

(b)

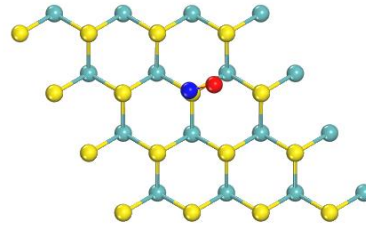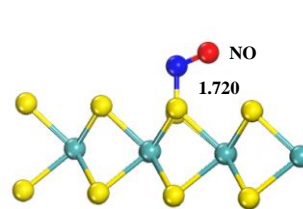

$E_{ad}=41.39$  kcal/mol  
Electric field=0.0050 a.u.

(c)

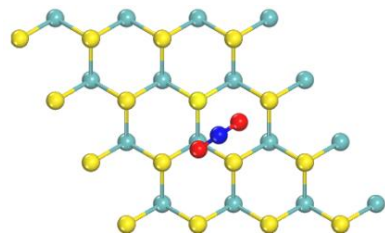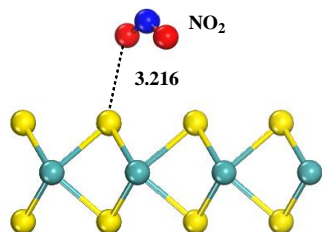

$E_{ad}=4.86$  kcal/mol  
Without electric field

(d)

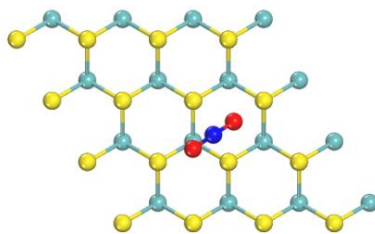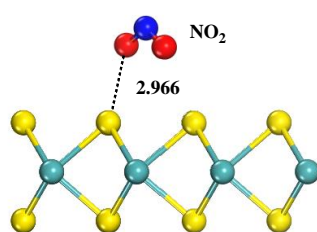

$E_{ad}=9.89$  kcal/mol  
Electric field=0.0020 a.u.

(e)

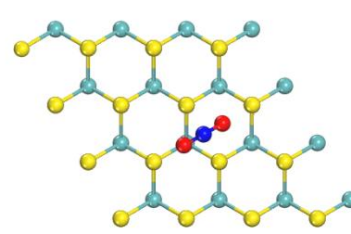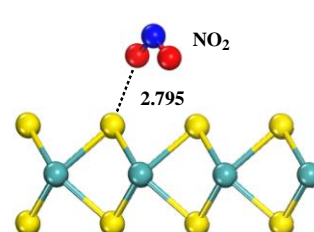

$E_{ad}=48.63$  kcal/mol  
Electric field=0.0050 a.u.

(f)

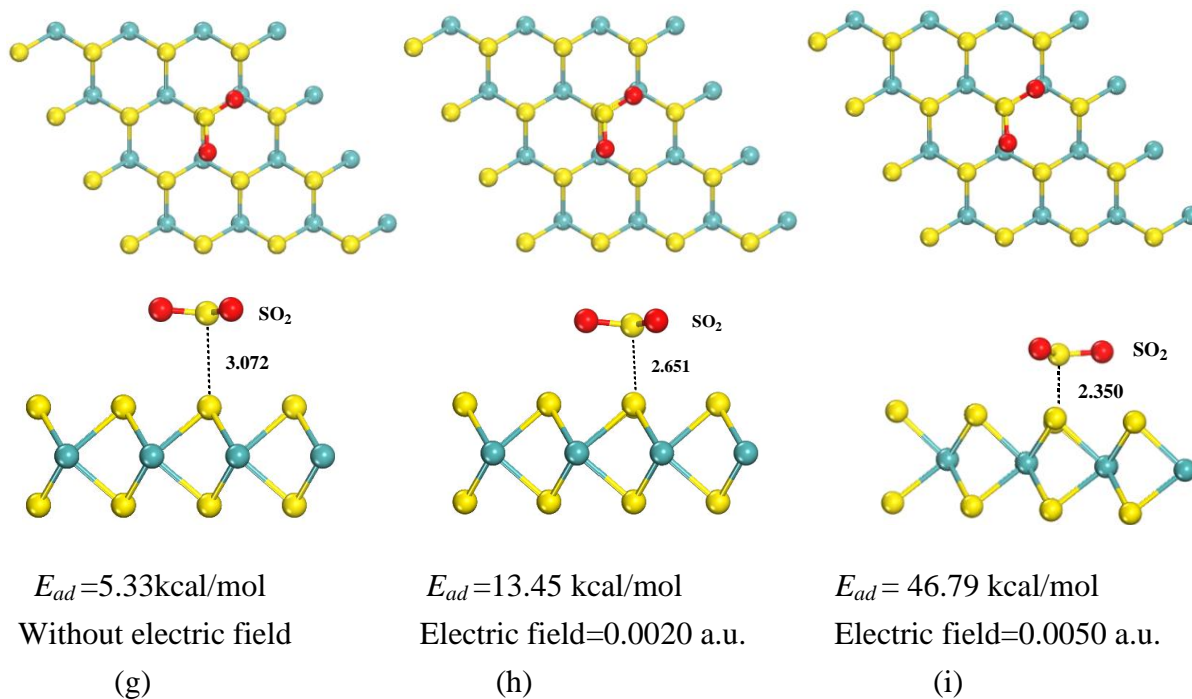

**Figure S3.** Top and side views of NO, NO<sub>2</sub> and SO<sub>2</sub> adsorbed on the surface of MoS<sub>2</sub> monolayer without an electric field, and with the electric fields of 0.0020 a.u. and 0.0050 a.u..

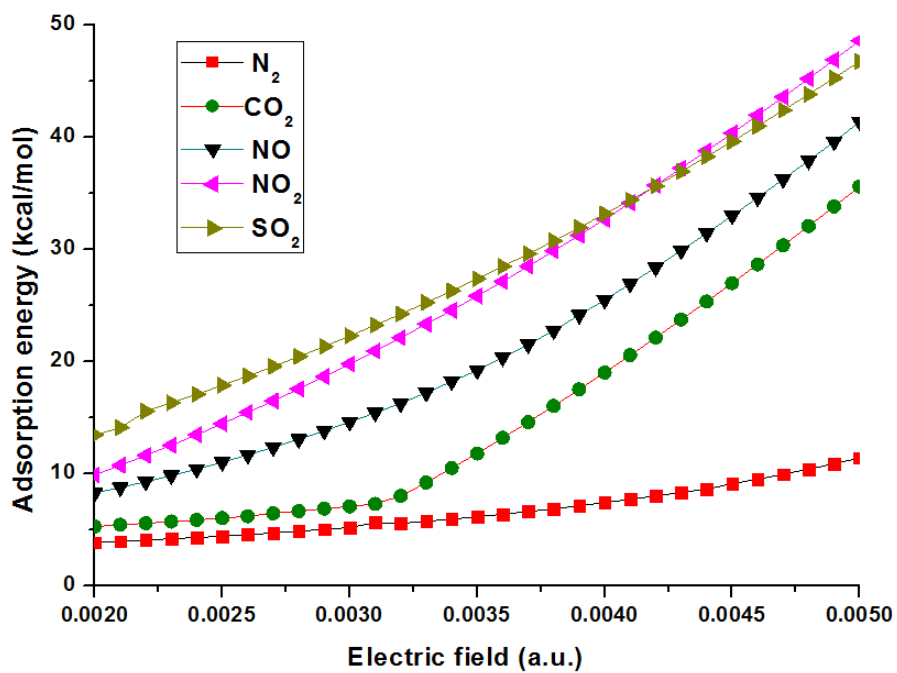

**Figure S4.** The adsorption energies (kcal/mol) of NO, NO<sub>2</sub>, SO<sub>2</sub>, CO<sub>2</sub> and N<sub>2</sub> adsorbed on the surface of MoS<sub>2</sub> monolayer with the applied electric fields in the range of 0.0020 ~ 0.0050 a.u..

Table S1. The important structural parameters, such as bond distance (Å) and bond angle (°), adsorption energies (kcal/mol) and electron transfer (e<sup>-</sup>) from MoS<sub>2</sub> surface to CO<sub>2</sub>, of CO<sub>2</sub> adsorbed on the surface of MoS<sub>2</sub> monolayer with different electric fields.

| E-field<br>(a.u.) | Adsorption<br>energy<br>(kcal/mol) | Bond<br>distance (Å) | Bond<br>distance (Å) | Bond<br>distance (Å) | Bond<br>angle (°) | CT     |
|-------------------|------------------------------------|----------------------|----------------------|----------------------|-------------------|--------|
|                   |                                    | C-S                  | O1-C                 | O2-C                 | OCO               | total  |
| 0.0020            | 5.29                               | 3.093                | 1.177                | 1.177                | 178.8             | -0.036 |
| 0.0021            | 5.44                               | 3.092                | 1.190                | 1.190                | 178.8             | -0.038 |
| 0.0022            | 5.58                               | 3.091                | 1.176                | 1.176                | 178.7             | -0.040 |
| 0.0023            | 5.73                               | 3.090                | 1.176                | 1.176                | 178.7             | -0.041 |
| 0.0024            | 5.88                               | 3.089                | 1.177                | 1.177                | 178.6             | -0.042 |
| 0.0025            | 6.04                               | 3.088                | 1.177                | 1.180                | 178.6             | -0.045 |
| 0.0026            | 6.20                               | 3.072                | 1.177                | 1.177                | 178.0             | -0.047 |
| 0.0027            | 6.46                               | 3.012                | 1.177                | 1.177                | 177.6             | -0.057 |
| 0.0028            | 6.66                               | 2.984                | 1.177                | 1.177                | 177.2             | -0.061 |
| 0.0029            | 6.87                               | 2.948                | 1.178                | 1.177                | 176.9             | -0.066 |
| 0.0030            | 7.08                               | 2.917                | 1.178                | 1.221                | 176.1             | -0.074 |
| 0.0031            | 7.30                               | 2.916                | 1.180                | 1.178                | 175.8             | -0.077 |
| 0.0032            | 8.01                               | 2.048                | 1.221                | 1.265                | 144.2             | -0.527 |
| 0.0033            | 9.21                               | 1.995                | 1.225                | 1.223                | 142.5             | -0.577 |
| 0.0034            | 10.51                              | 1.99                 | 1.226                | 1.225                | 142.1             | -0.589 |
| 0.0035            | 11.81                              | 1.959                | 1.180                | 1.180                | 172.6             | -0.623 |
| 0.0036            | 13.19                              | 1.954                | 1.230                | 1.228                | 140.7             | -0.634 |
| 0.0037            | 14.60                              | 1.938                | 1.233                | 1.230                | 140.0             | -0.656 |
| 0.0038            | 16.04                              | 1.918                | 1.236                | 1.233                | 139.2             | -0.680 |
| 0.0039            | 17.52                              | 1.914                | 1.236                | 1.233                | 139.0             | -0.694 |
| 0.0040            | 19.03                              | 1.904                | 1.237                | 1.235                | 138.6             | -0.711 |
| 0.0041            | 20.57                              | 1.901                | 1.238                | 1.255                | 138.4             | -0.724 |
| 0.0042            | 22.14                              | 1.889                | 1.240                | 1.237                | 137.9             | -0.743 |
| 0.0043            | 23.74                              | 1.882                | 1.241                | 1.238                | 137.6             | -0.758 |
| 0.0044            | 25.36                              | 1.872                | 1.242                | 1.239                | 137.2             | -0.776 |
| 0.0045            | 27.01                              | 1.864                | 1.243                | 1.240                | 136.9             | -0.792 |
| 0.0046            | 28.68                              | 1.857                | 1.250                | 1.241                | 136.6             | -0.807 |
| 0.0047            | 30.37                              | 1.853                | 1.245                | 1.242                | 136.4             | -0.821 |
| 0.0048            | 32.10                              | 1.845                | 1.247                | 1.243                | 136.0             | -0.832 |
| 0.0049            | 33.84                              | 1.835                | 1.248                | 1.245                | 135.7             | -0.854 |
| 0.0050            | 35.62                              | 1.833                | 1.249                | 1.245                | 135.6             | -0.865 |

Table S2. The important structural parameters, such as bond distance (Å) and bond angle (°), adsorption energies (kcal/mol) and electron transfer (e<sup>-</sup>) from MoS<sub>2</sub> surface to N<sub>2</sub>, of N<sub>2</sub> adsorbed on the surface of MoS<sub>2</sub> monolayer with different electric fields.

| E-field<br>(a.u.) | Adsorption<br>energy<br>(kcal/mol) | Bond<br>distance (Å) | Bond<br>distance (Å) | Bond angle<br>(°) | Bond<br>angle (°) | CT     |
|-------------------|------------------------------------|----------------------|----------------------|-------------------|-------------------|--------|
|                   |                                    | N1-S1                | N1-N2                | S1N1N2            | S1N1S2            | total  |
| 0.0020            | 3.85                               | 3.329                | 1.109                | 108.1             | 57.2              | -0.027 |
| 0.0021            | 3.96                               | 3.320                | 1.109                | 108.1             | 57.3              | -0.029 |
| 0.0022            | 4.08                               | 3.296                | 1.109                | 108.3             | 57.8              | -0.032 |
| 0.0023            | 4.20                               | 3.296                | 1.109                | 108.2             | 57.8              | -0.033 |
| 0.0024            | 4.31                               | 3.281                | 1.109                | 108.9             | 58.1              | -0.037 |
| 0.0025            | 4.41                               | 3.210                | 1.109                | 108.6             | 59.5              | -0.044 |
| 0.0026            | 4.56                               | 3.209                | 1.109                | 108.6             | 59.6              | -0.046 |
| 0.0027            | 4.71                               | 3.208                | 1.110                | 108.6             | 59.6              | -0.048 |
| 0.0028            | 4.87                               | 3.207                | 1.110                | 108.7             | 59.6              | -0.051 |
| 0.0029            | 5.03                               | 3.207                | 1.110                | 108.7             | 59.6              | -0.053 |
| 0.0030            | 5.20                               | 3.206                | 1.110                | 108.7             | 59.6              | -0.056 |
| 0.0031            | 5.65                               | 3.175                | 1.111                | 108.8             | 60.2              | -0.065 |
| 0.0032            | 5.56                               | 3.162                | 1.111                | 108.8             | 60.5              | -0.067 |
| 0.0033            | 5.75                               | 3.161                | 1.111                | 108.8             | 60.5              | -0.070 |
| 0.0034            | 5.95                               | 3.146                | 1.111                | 108.9             | 60.8              | -0.075 |
| 0.0035            | 6.16                               | 3.132                | 1.111                | 109.1             | 61.2              | -0.082 |
| 0.0036            | 6.39                               | 3.116                | 1.112                | 109.2             | 61.5              | -0.088 |
| 0.0037            | 6.62                               | 3.097                | 1.112                | 109.5             | 62.0              | -0.097 |
| 0.0038            | 6.87                               | 3.063                | 1.113                | 109.6             | 62.7              | -0.106 |
| 0.0039            | 7.13                               | 3.052                | 1.113                | 109.3             | 62.8              | -0.115 |
| 0.0040            | 7.42                               | 3.051                | 1.113                | 109.1             | 62.8              | -0.115 |
| 0.0041            | 7.71                               | 3.048                | 1.114                | 109.5             | 62.9              | -0.124 |
| 0.0042            | 8.01                               | 3.046                | 1.114                | 109.5             | 63.0              | -0.130 |
| 0.0043            | 8.32                               | 3.043                | 1.115                | 109.6             | 63.0              | -0.136 |
| 0.0044            | 8.63                               | 3.04                 | 1.115                | 109.7             | 63.1              | -0.143 |
| 0.0045            | 9.11                               | 2.948                | 1.117                | 110.4             | 65.4              | -0.173 |
| 0.0046            | 9.52                               | 2.943                | 1.118                | 110.7             | 65.7              | -0.185 |
| 0.0047            | 9.95                               | 2.903                | 1.118                | 110.8             | 66.6              | -0.199 |
| 0.0048            | 10.41                              | 2.883                | 1.119                | 110.9             | 67.1              | -0.213 |
| 0.0049            | 10.89                              | 2.862                | 1.120                | 111.1             | 67.7              | -0.227 |
| 0.0050            | 11.41                              | 2.840                | 1.121                | 111.3             | 68.3              | -0.243 |
